# Supplementary material for: Perspective: what is known, and not known, about the connections between alkane oxidation and metal uptake in alkanotrophs in the marine environment
Source: Royal Society of Chemistry journal article supplement (doi:10.1039/c4mt00041b), 2014-01-01
Supplement: c4mt00041b1.pdf [file c4mt00041b1.pdf]

Supplemental Information for Perspective: What is known, and not known, about the connections between alkane oxidation and metal uptake in alkanotrophs in the marine environment.

Rachel Narehood Austin\*, Grace E. Kenney, Amy C. Rosenzweig

Determining the specific substrate range of particular alkane-oxidizing enzymes is difficult, and researchers have taken different approaches to its characterization. In some cases, the information is based on the activity of the purified enzyme, whereas in other cases it derives from how disruption of a particular gene impacts the organism's growth on different substrates. In a third approach, researchers assess what size alkanes stimulate the transcription of the relevant RNA. Table 1 provides a guide to the substrate ranges of specific enzymes determined by all of these different published approaches.<sup>1</sup>

| Enzyme                                   | Active site Identity | Soluble or Particulate | Substrate range    |
|------------------------------------------|----------------------|------------------------|--------------------|
| Particulate methane monooxygenase (pMMO) | Dicopper             | Particulate            | C1-C4 <sup>2</sup> |
| Soluble methane monooxygenase (sMMO)     | Diiron               | Soluble                | C1-C7              |
| Ethane monooxygenase                     | Dicopper (putative)  | Particulate            | C2 <sup>3</sup>    |
| Propane monooxygenase                    | Diiron               | Soluble                | C2-C4              |
| Butane monooxygenase (BMO)               | Diiron               | Soluble                | C2-C4              |
| Alkane monooxygenase (AlkB)              | Diiron               | Particulate            | C5-C32             |
| Cytochrome P450 (CYP)                    | Heme iron            | Soluble                | C5-C12             |

|      |        |         |      |
|------|--------|---------|------|
| LadA | Flavin | Soluble | >C15 |
| AlmA | Flavin | Soluble | >C32 |

Table 1 Summary of Aerobic Alkane Oxidizing Enzymes

1. R. N. Austin and J. T. Groves, *Metallomics*, 2011, **3**, 775-787.
2. S. Drummond, S. Smith and H. Dalton, *Eur. J. Biochem.*, 1989, **182**, 667-671.
3. M. C. Redmond, D. L. Valentine and A. L. Sessions, *Appl. Environ. Microbiol.*, 2010, **76**.
